# Supplementary material
Source: ML conference proceedings conference paper supplement (https://openreview.net/forum?id=5AJapJoSOZ)

True Samples

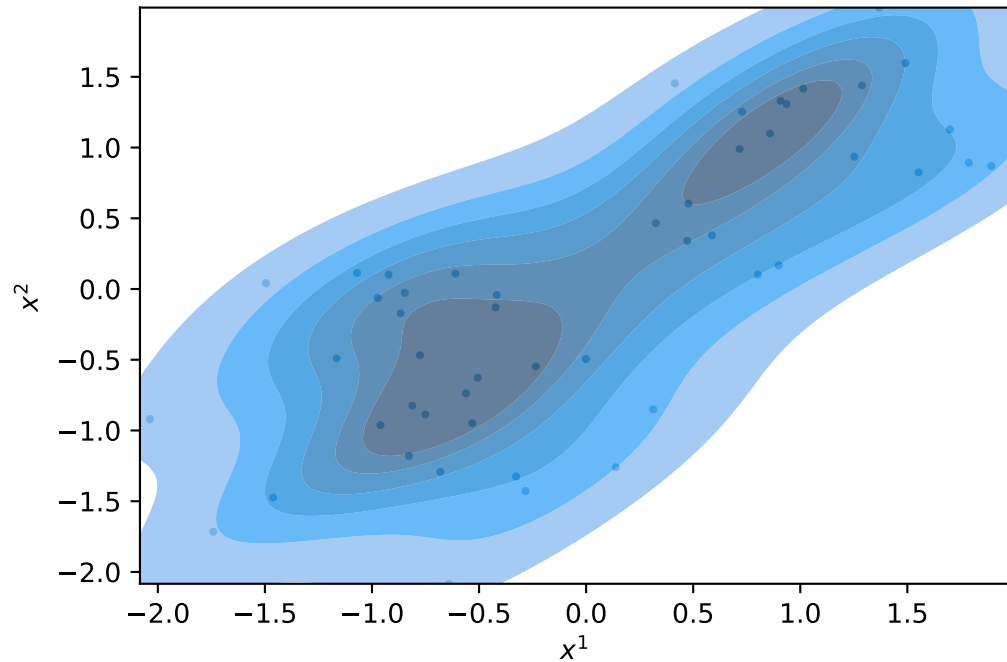

Initial Samples

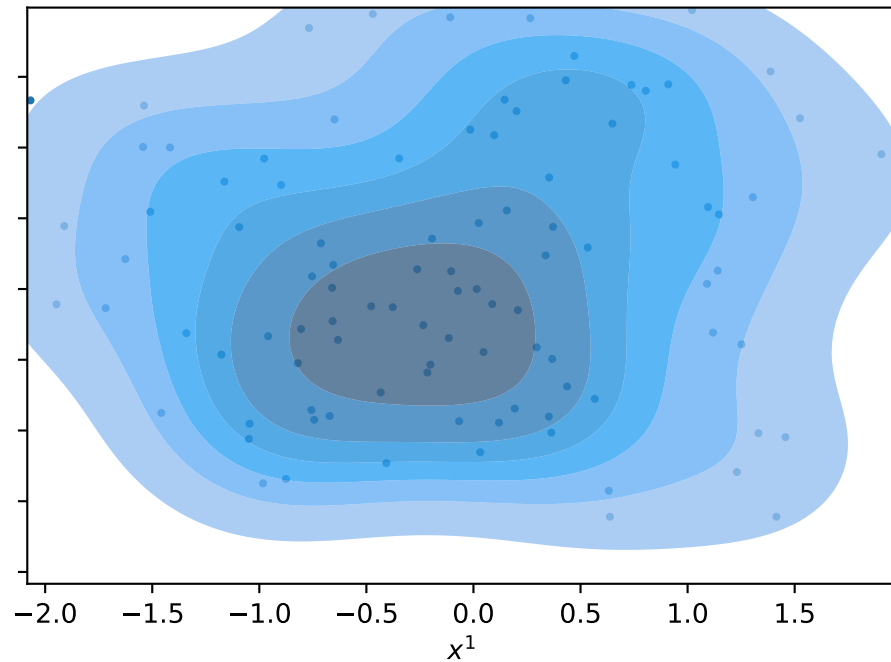

Final Samples

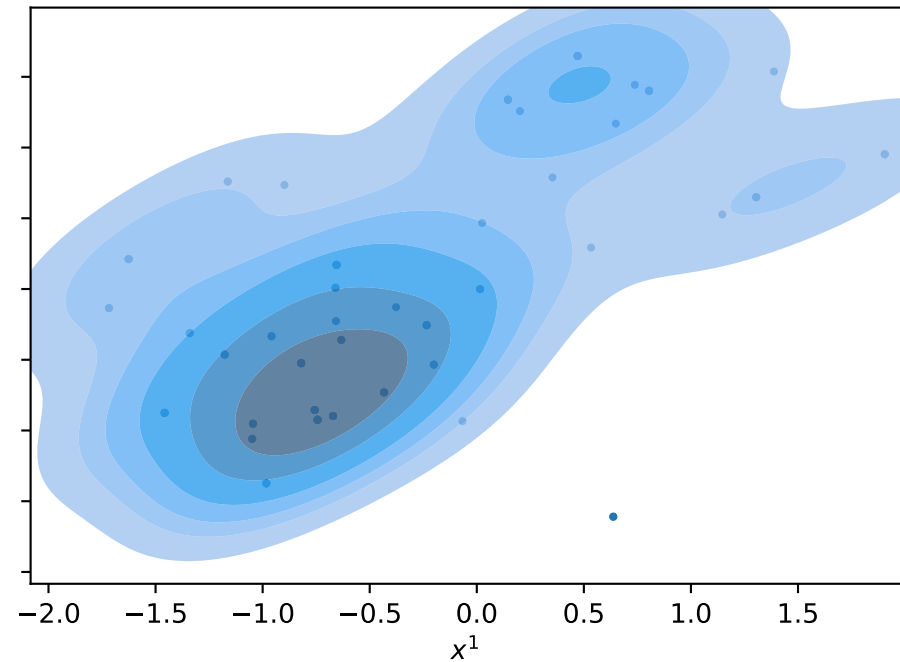

Supplement: supplementary_material [file attachment]

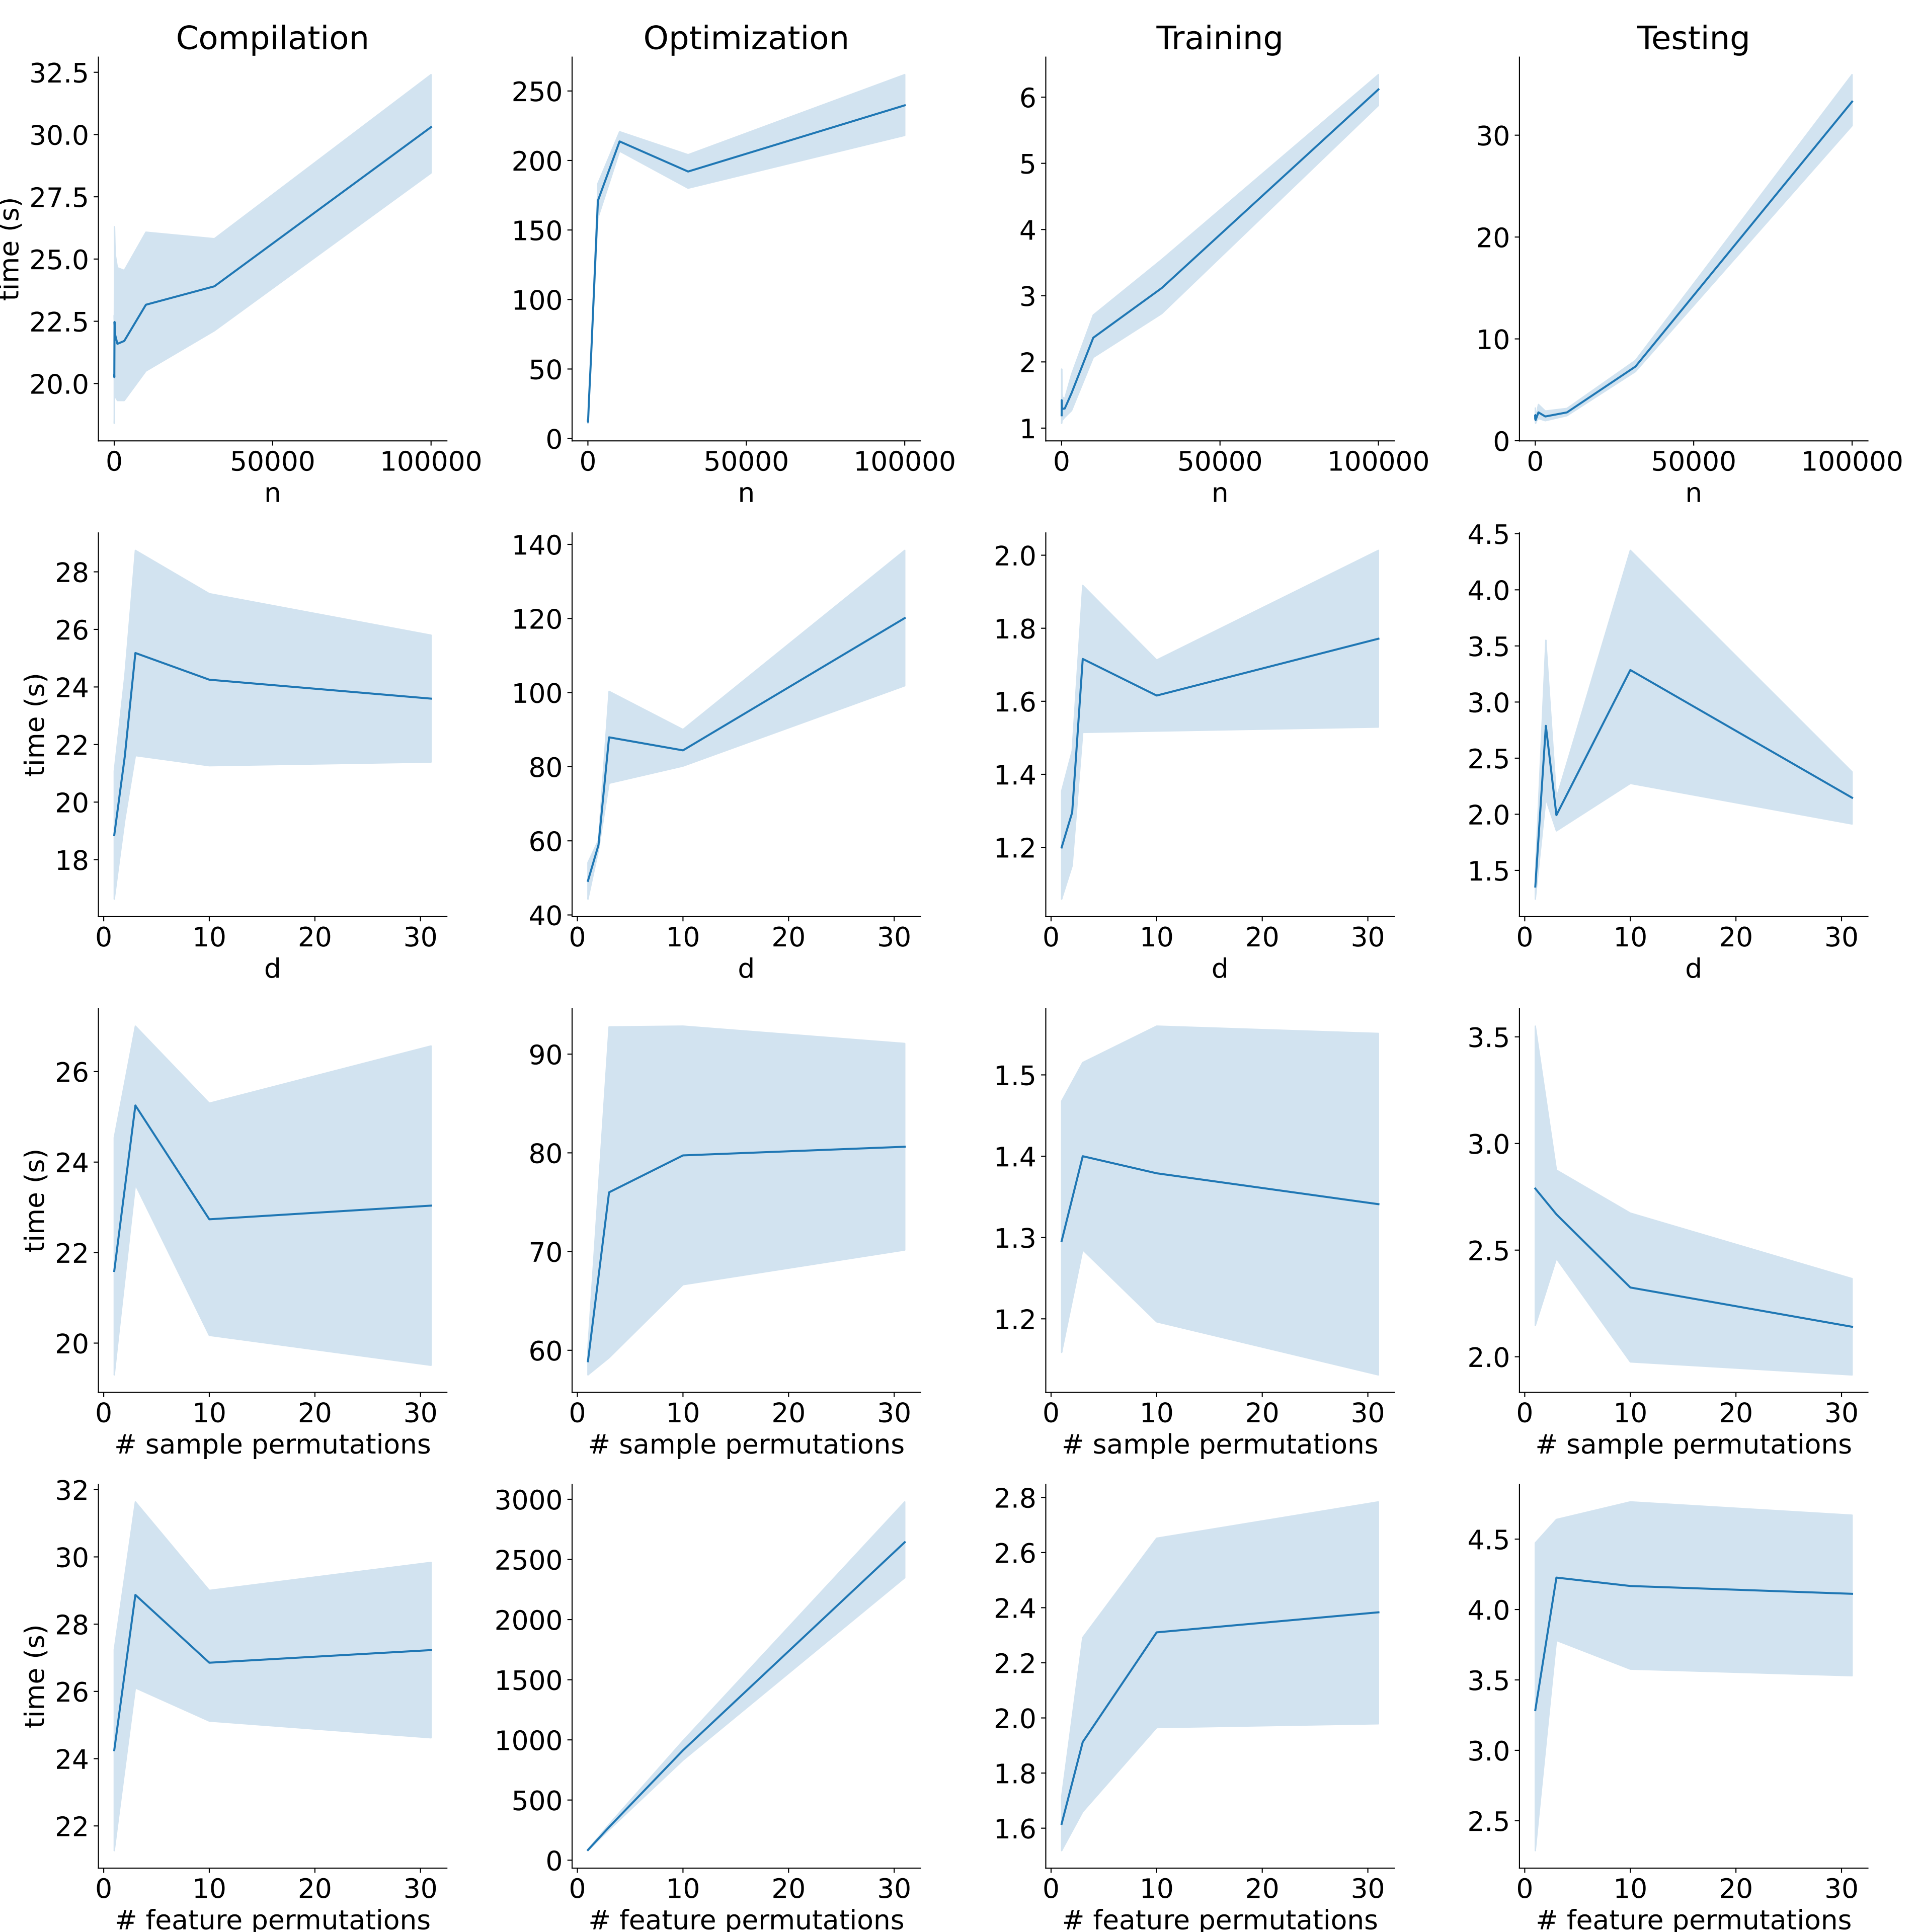

Supplement: supplementary_material [file attachment]

$n = 1$  $n = 2$  $n = 7$  $n = 20$  $n = 54$  $n = 500$ 

R-BP

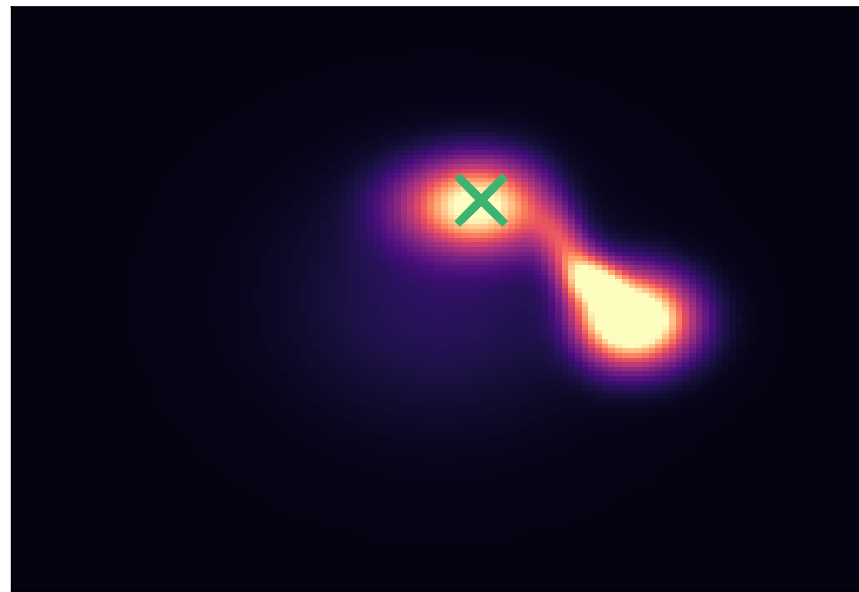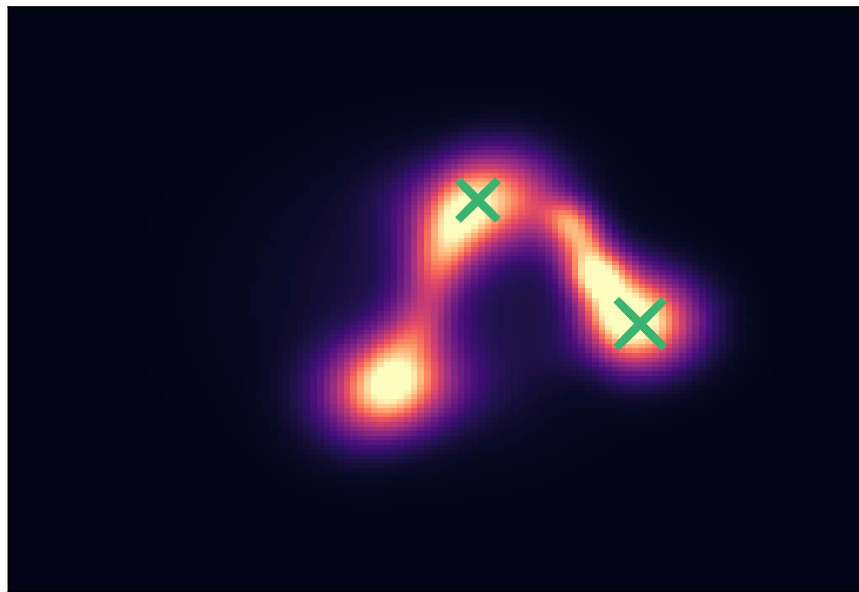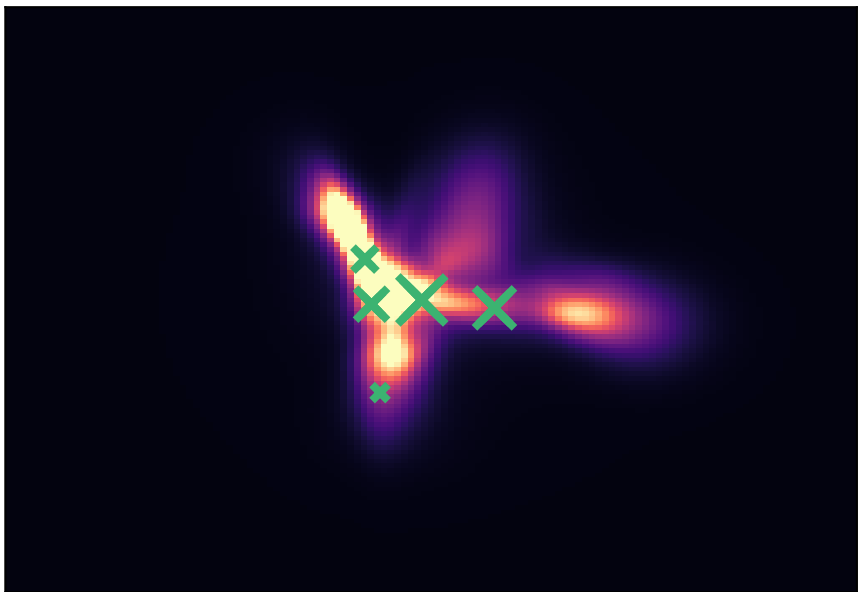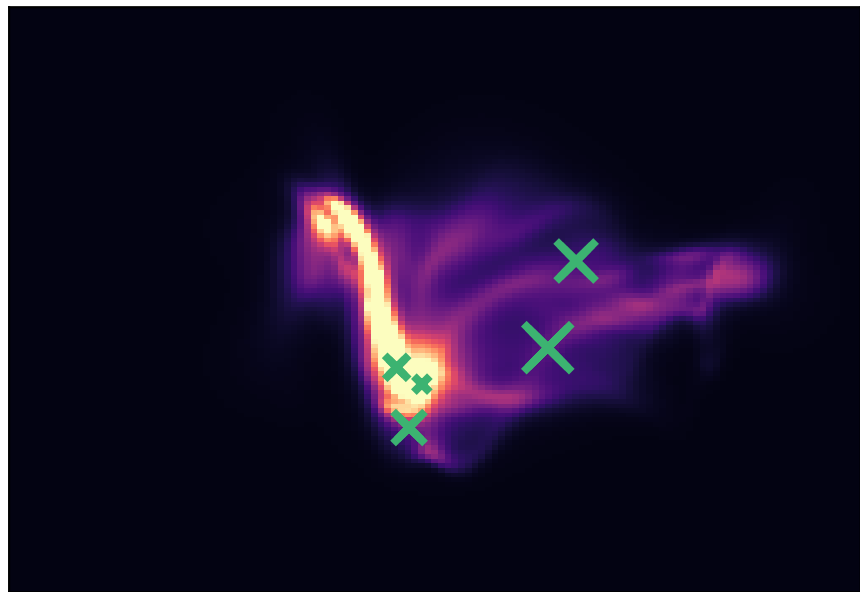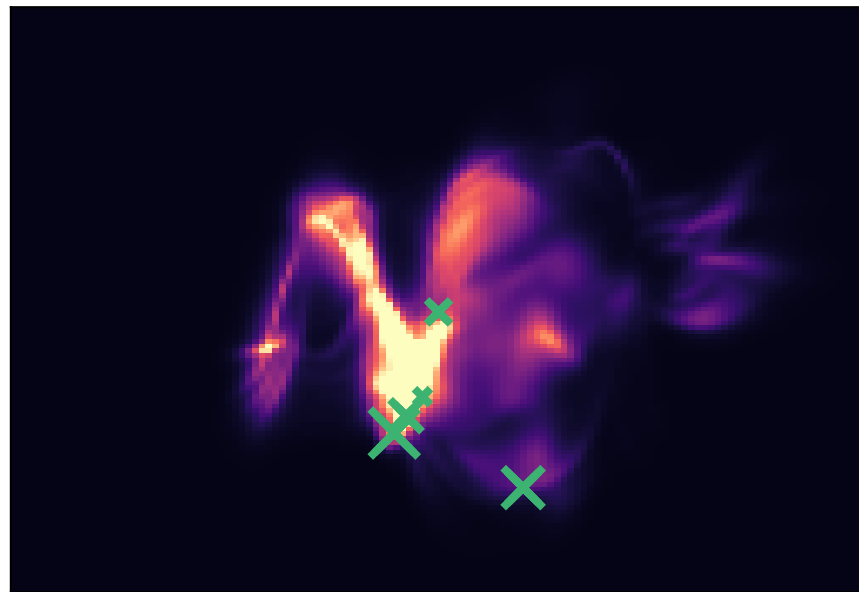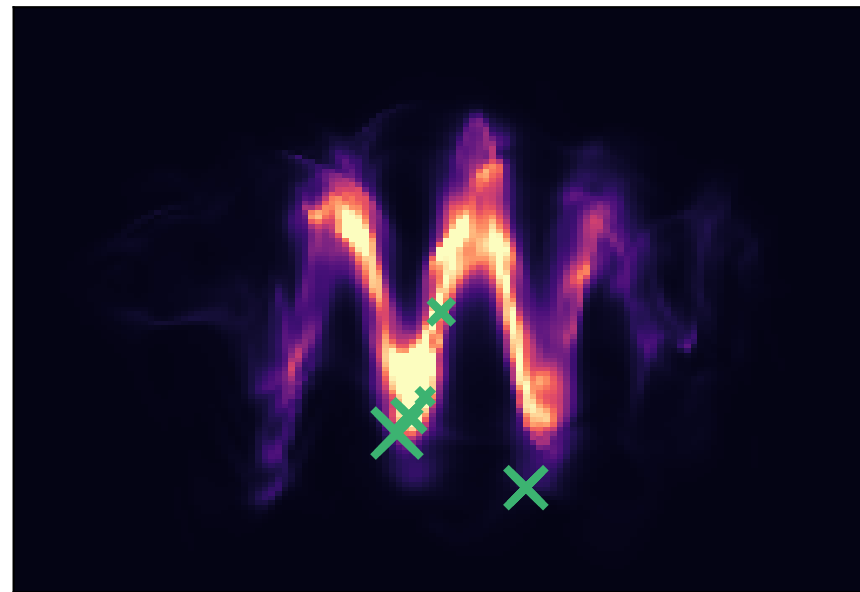

AR-BP

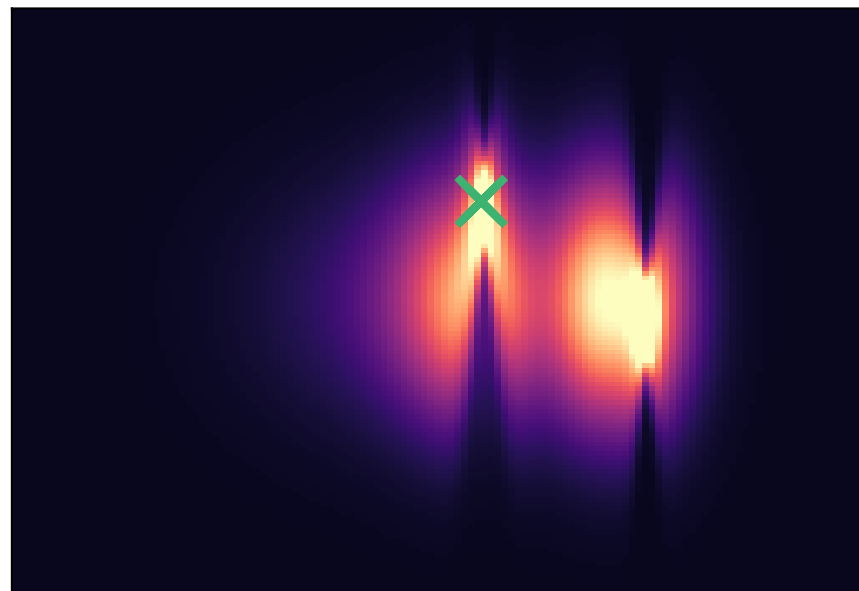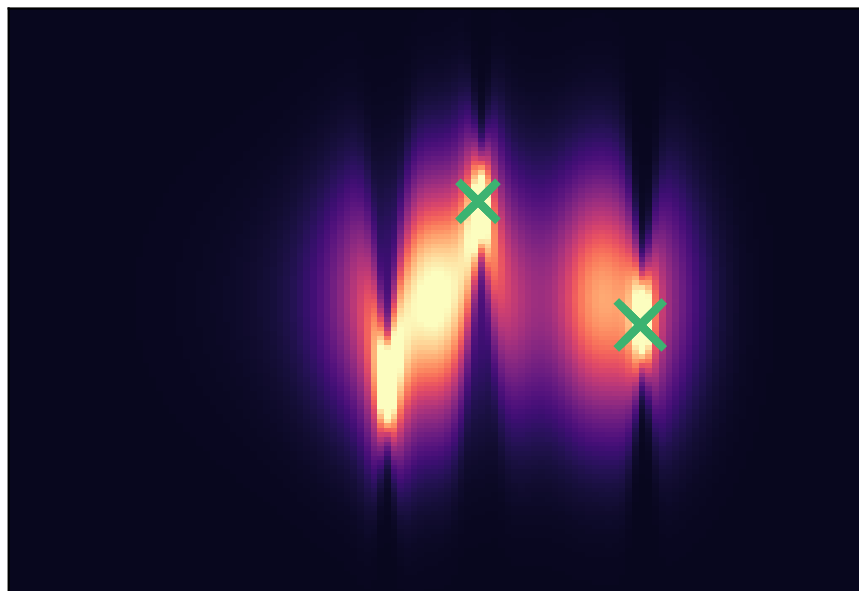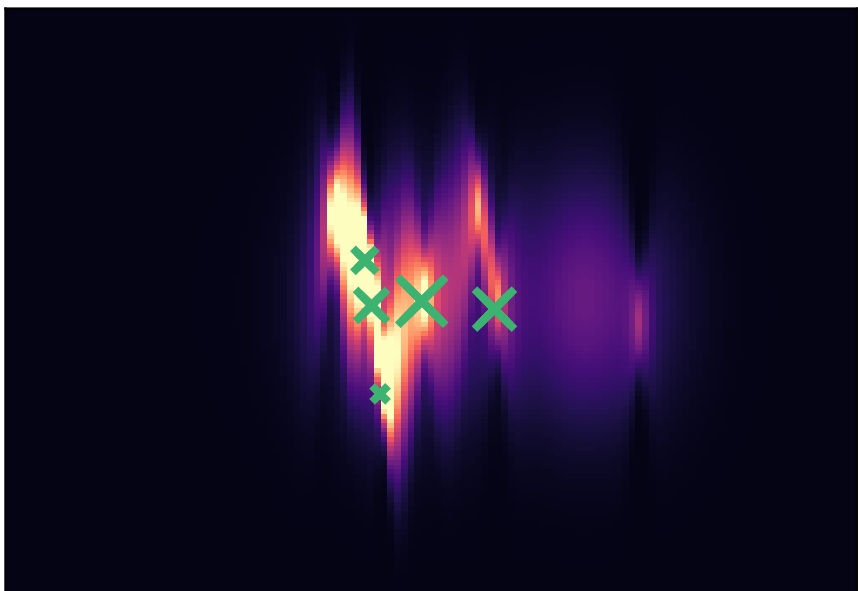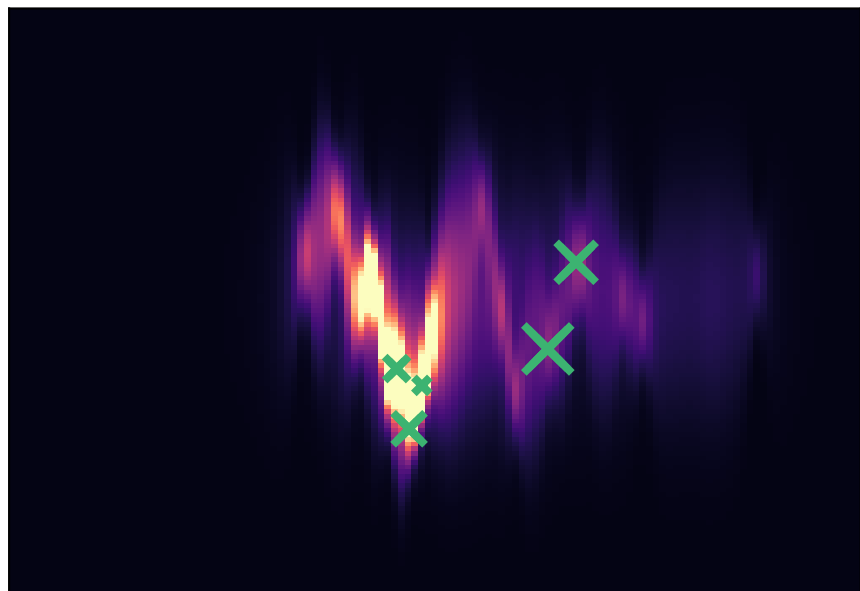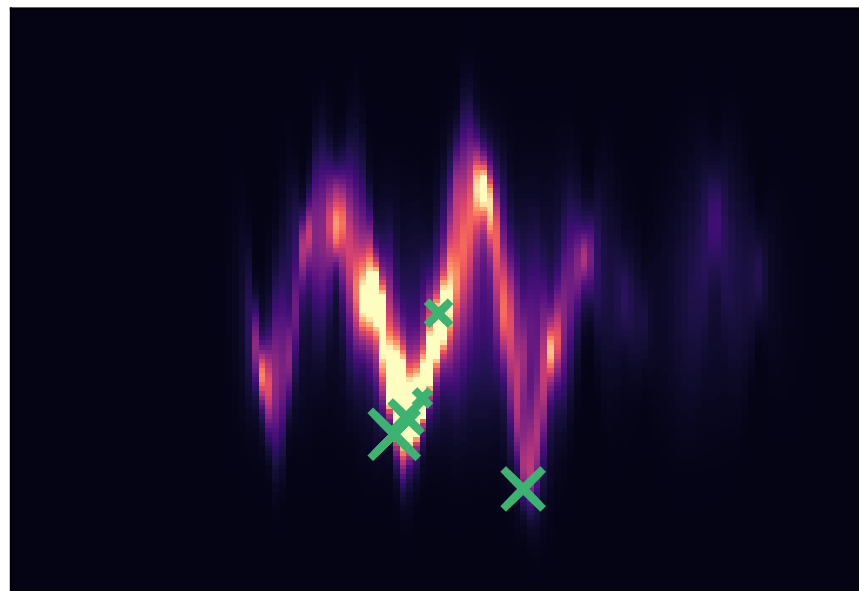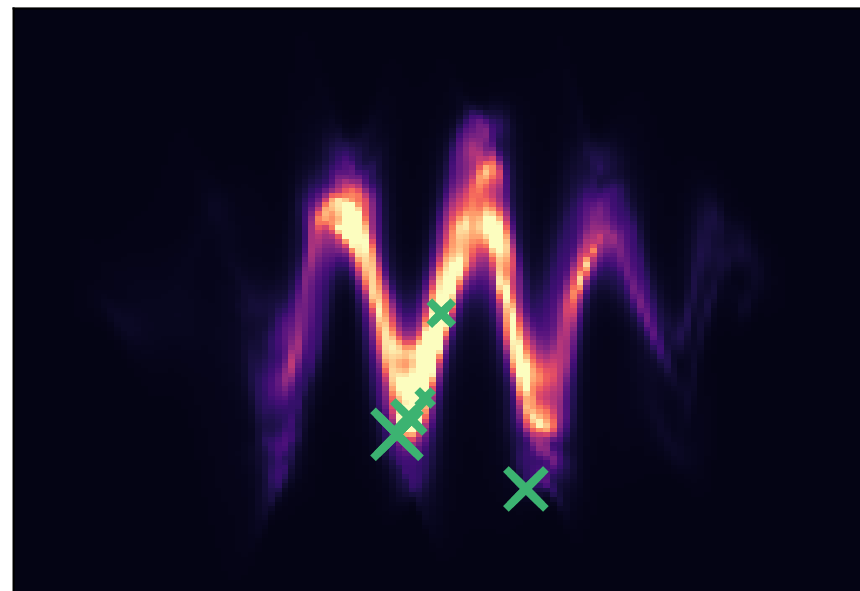

ARnet-BP

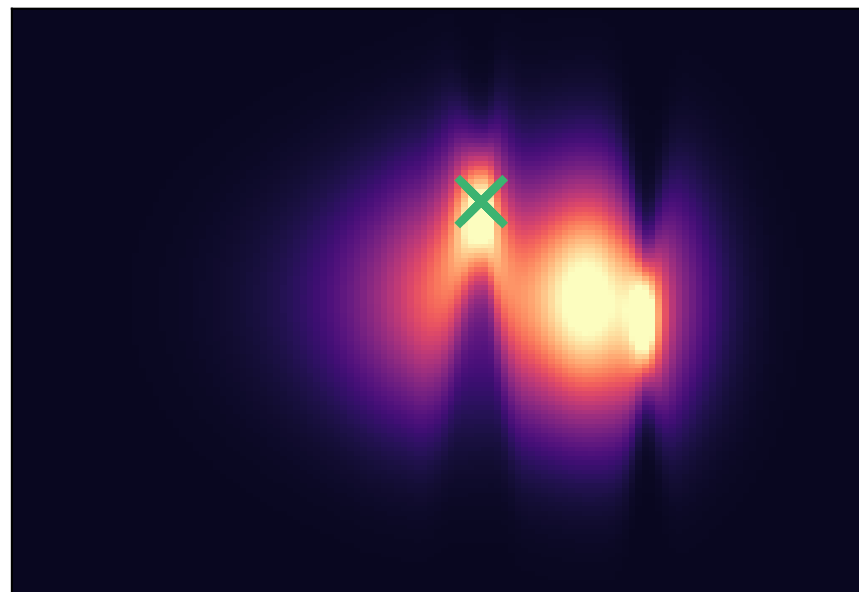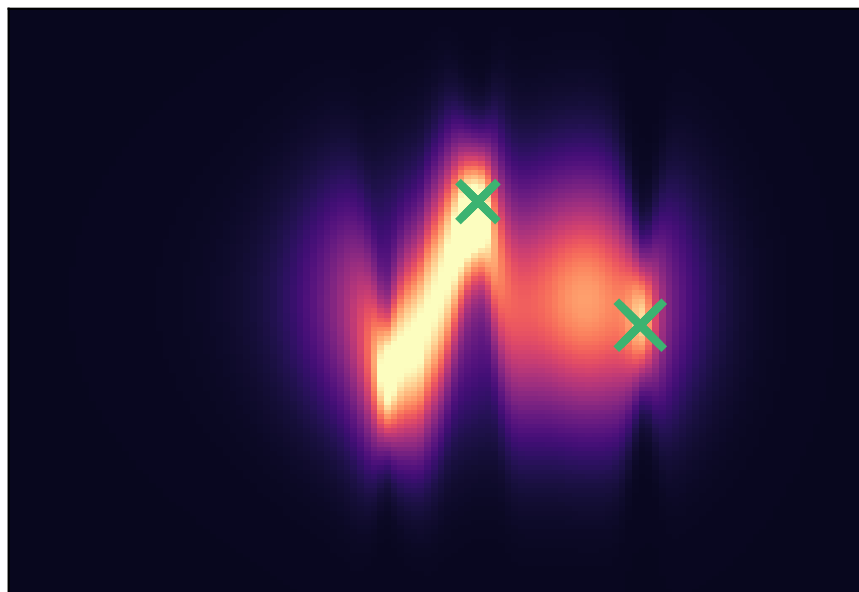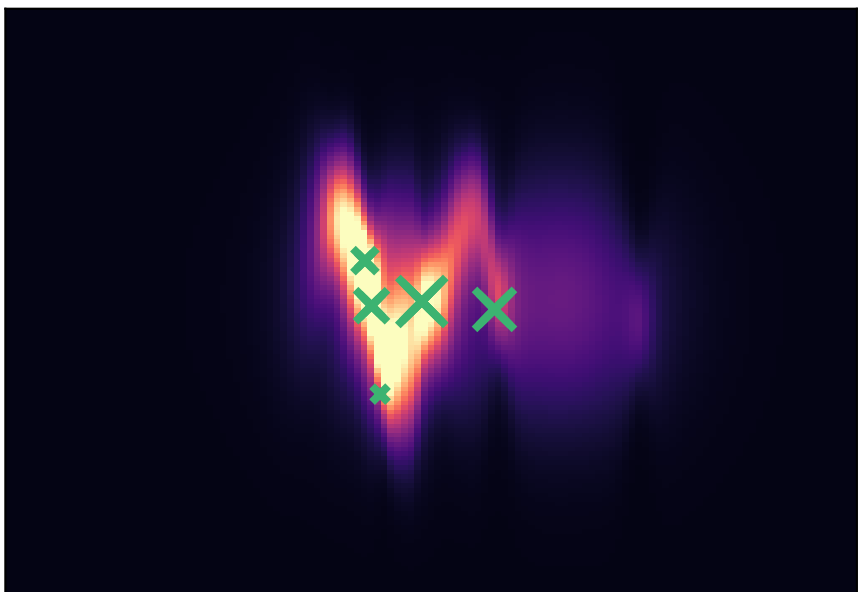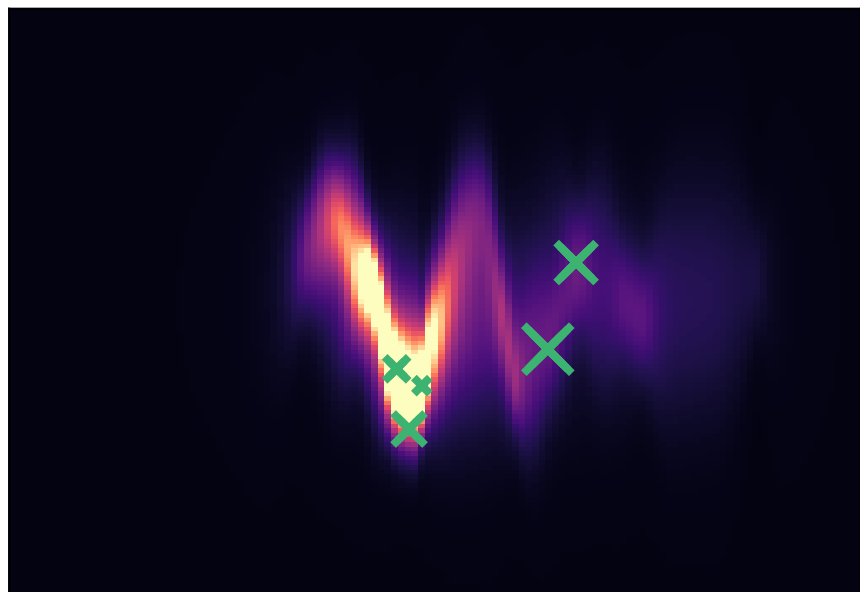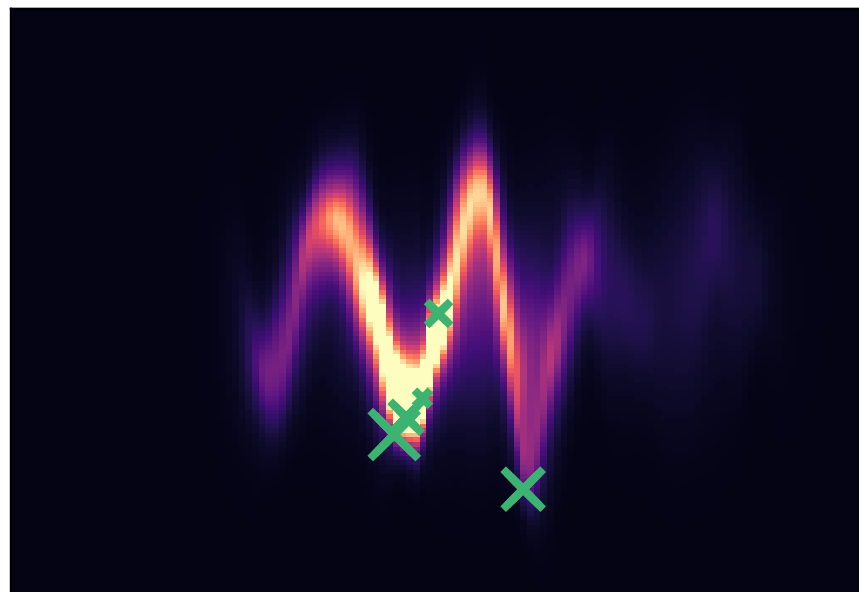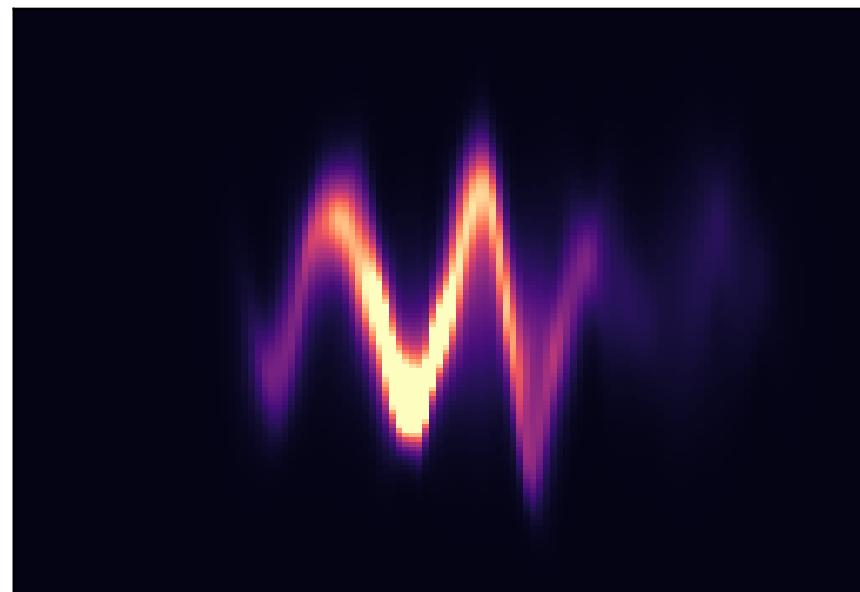

Supplement: supplementary_material [file attachment]

True Samples

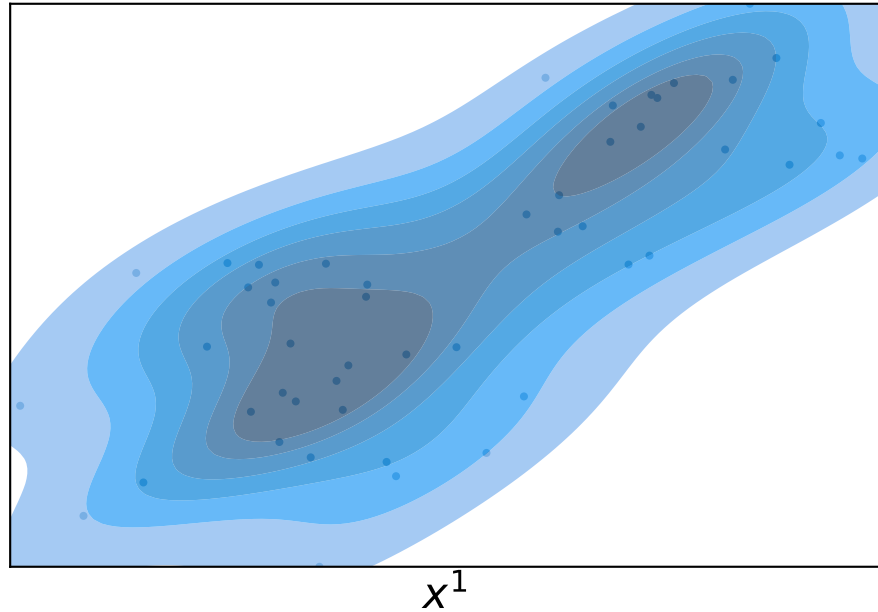

Initial Samples

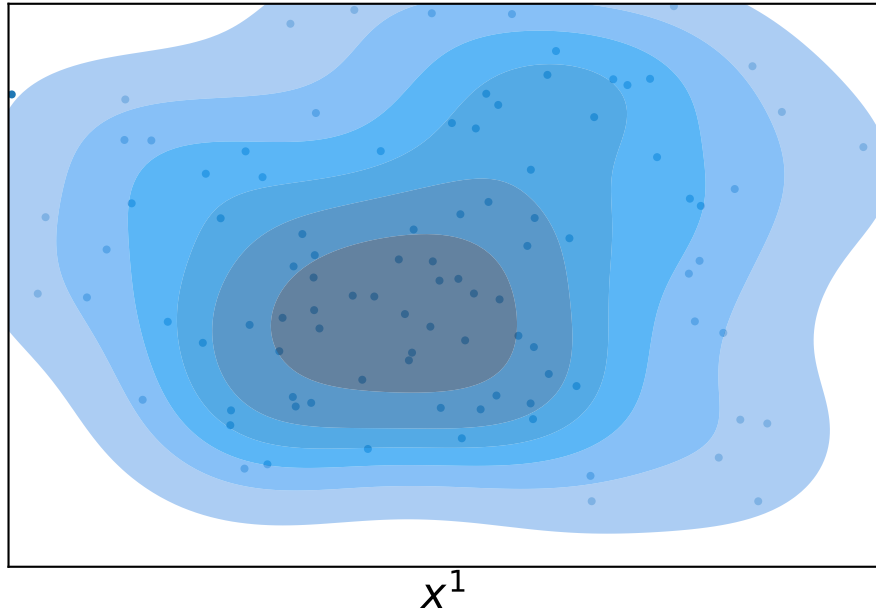

Final Samples

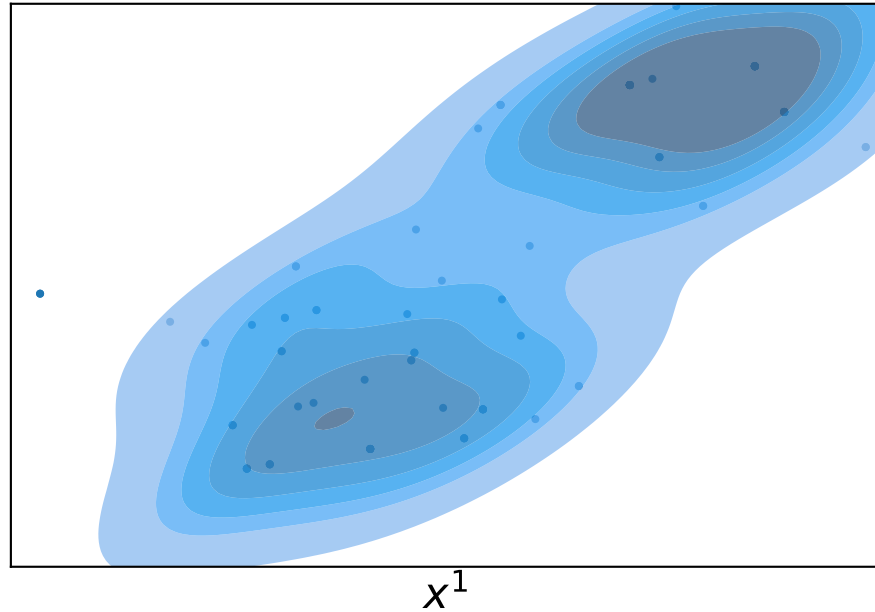

Supplement: supplementary_material [file attachment]

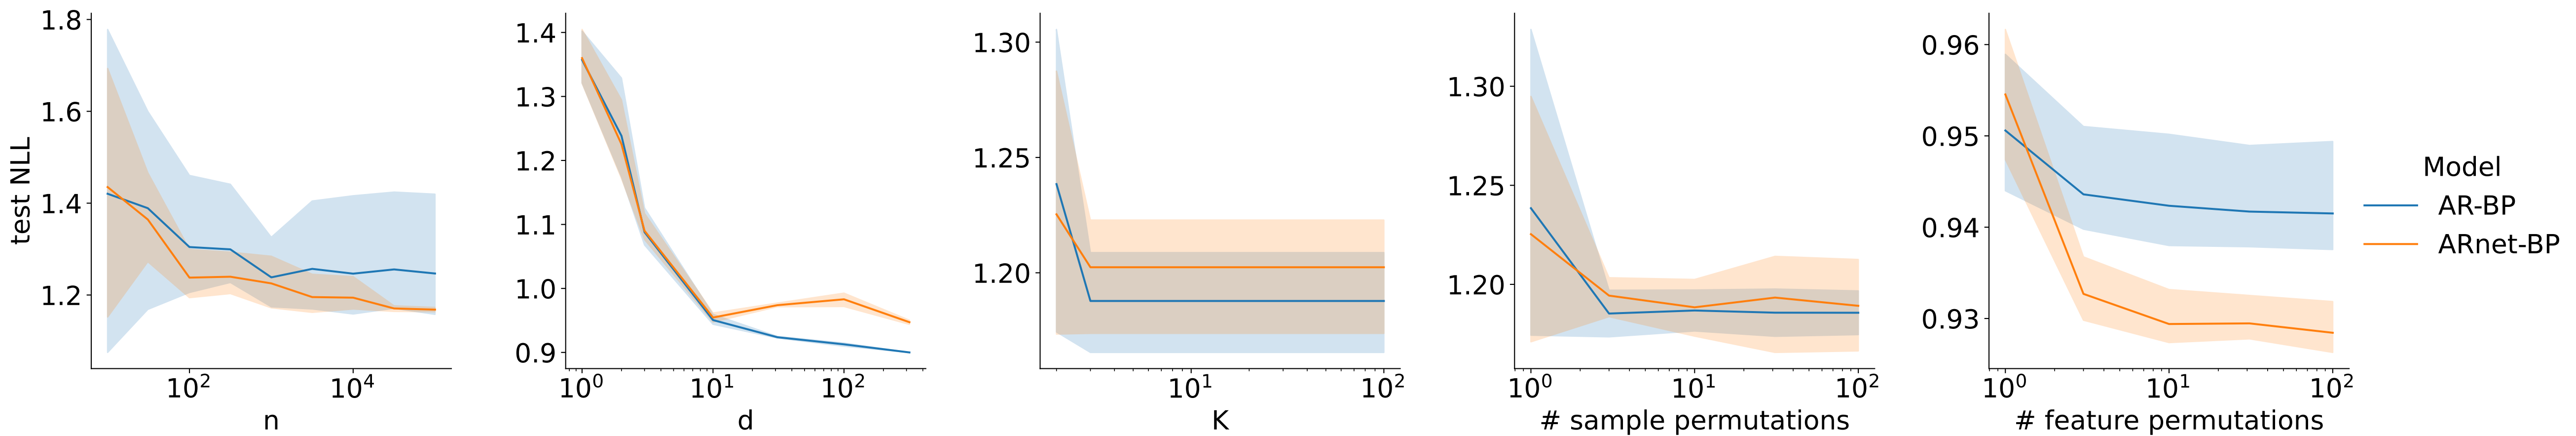

Supplement: supplementary_material [file attachment]

True Samples

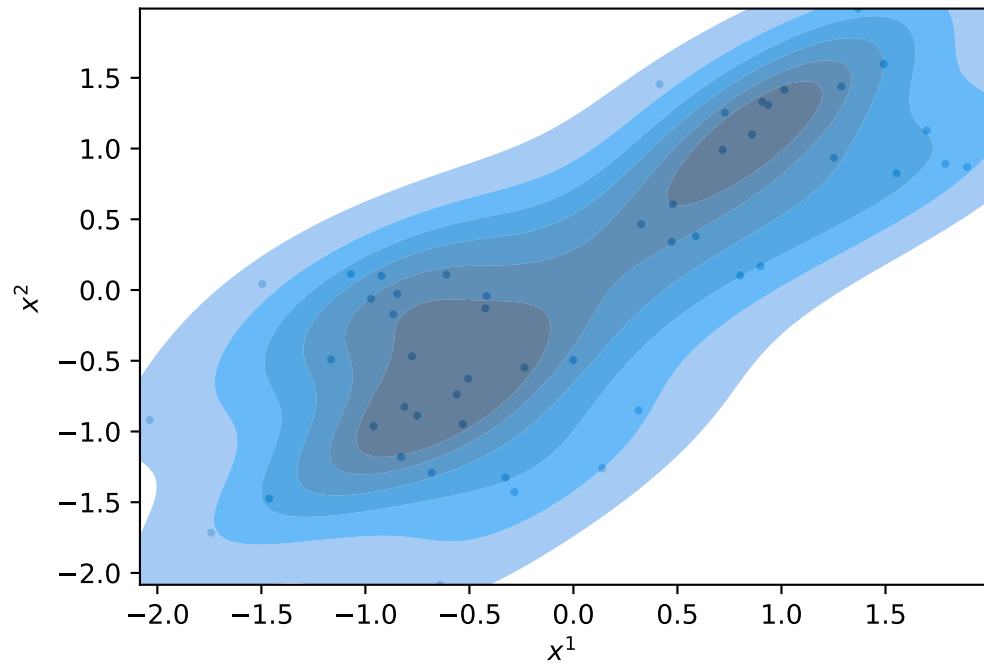

Final Samples

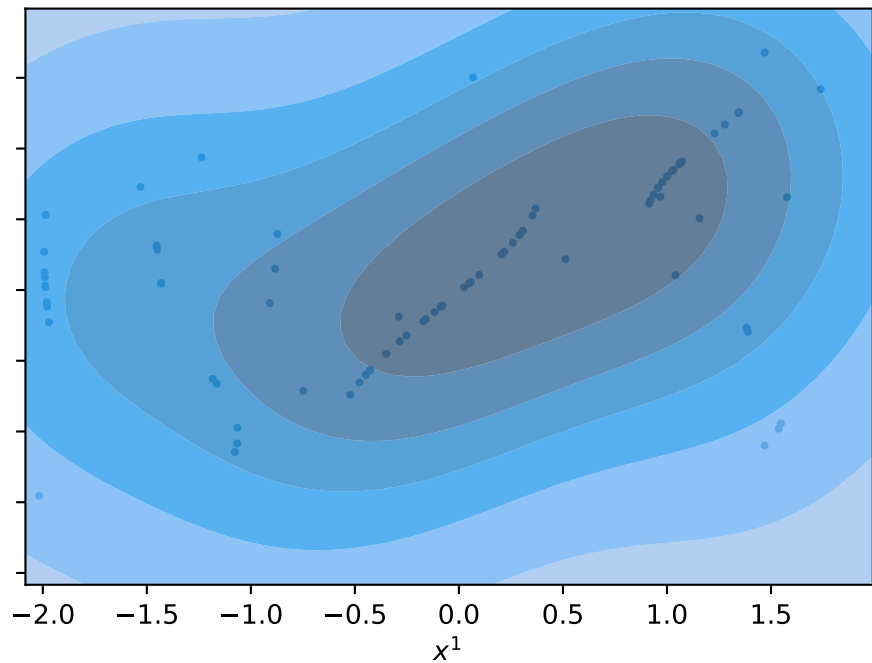

Supplement: supplementary_material [file attachment]

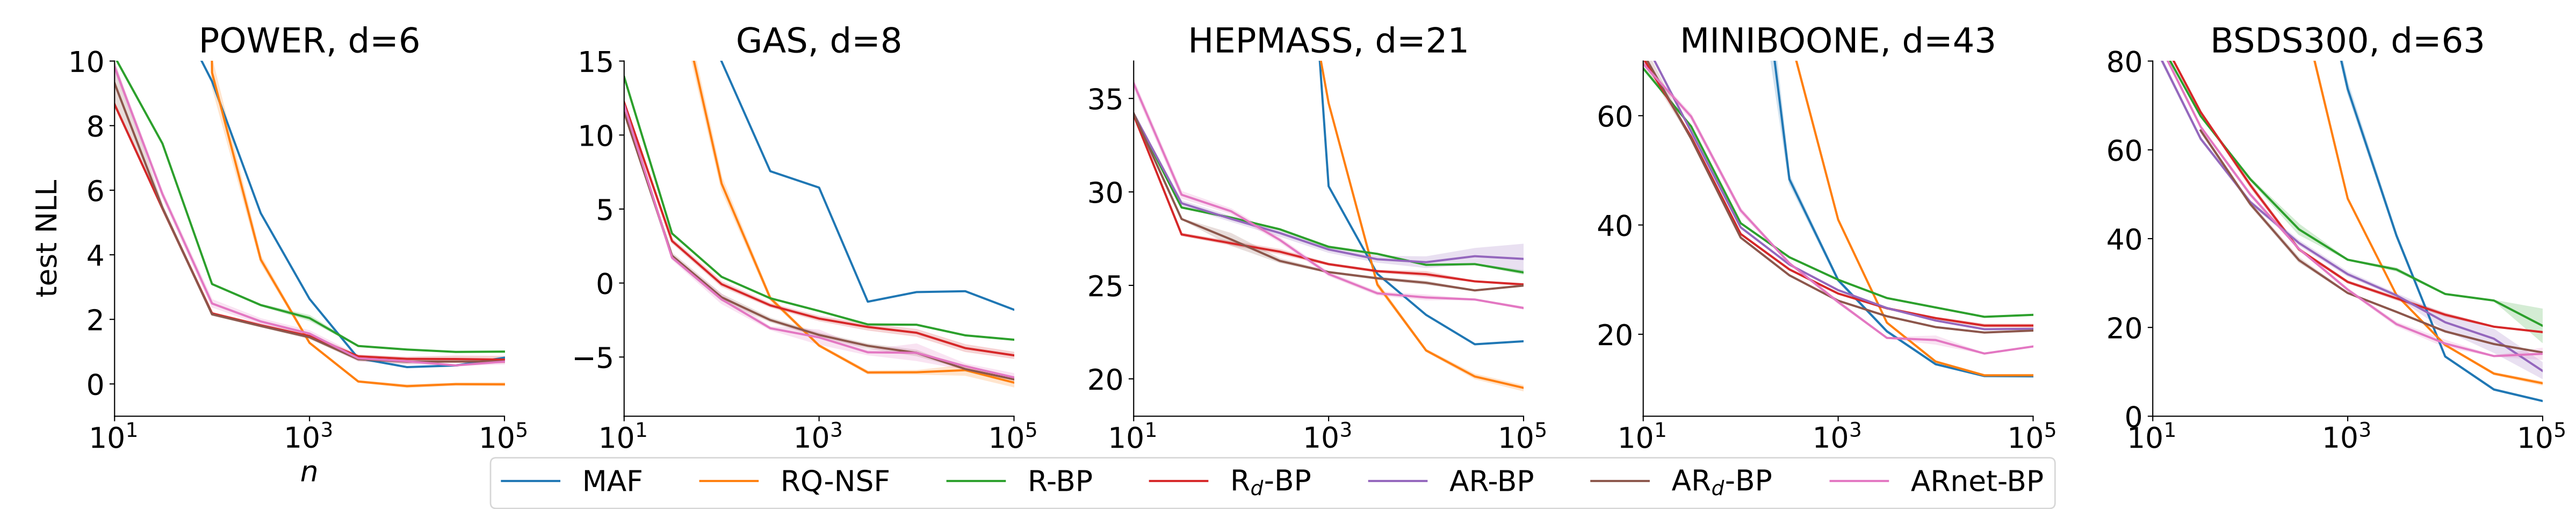

Supplement: supplementary_material [file attachment]

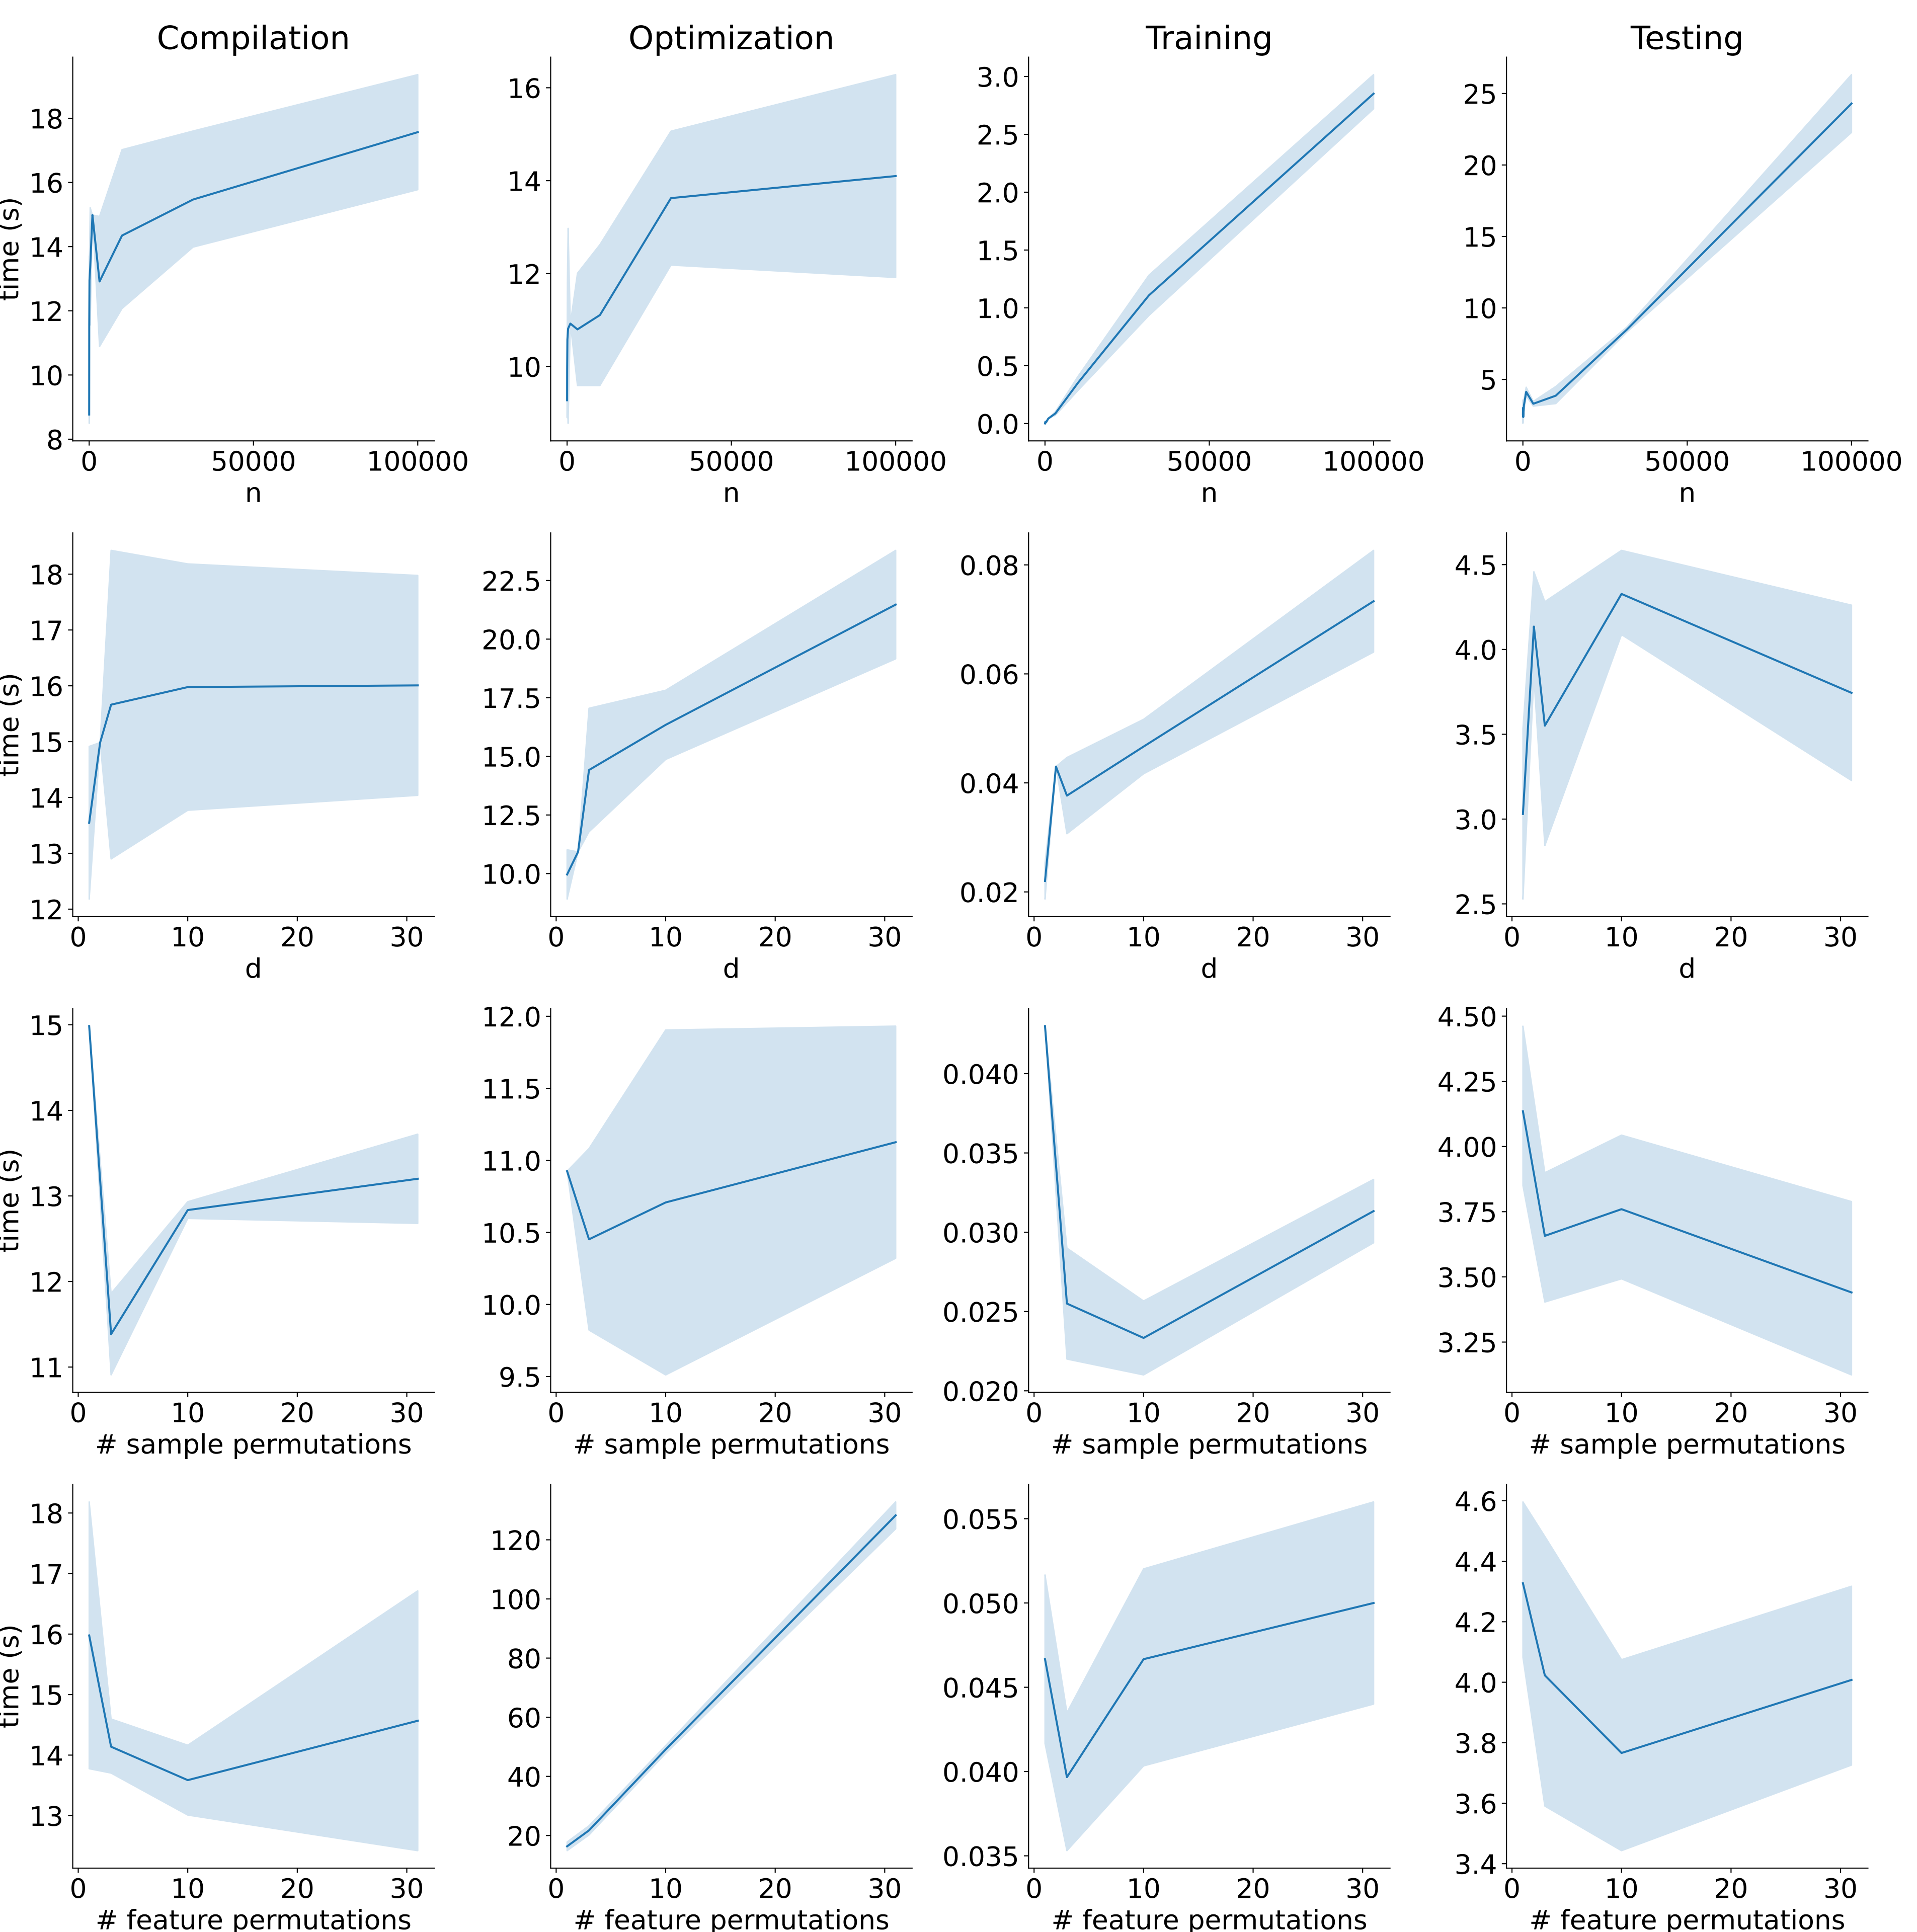

Supplement: supplementary_material [file attachment]

True Samples



Initial Samples

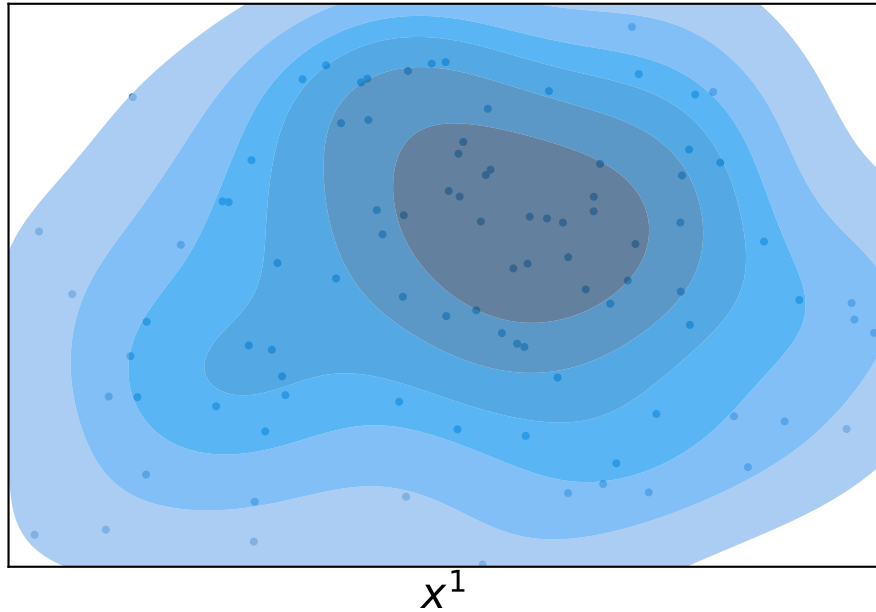

Final Samples

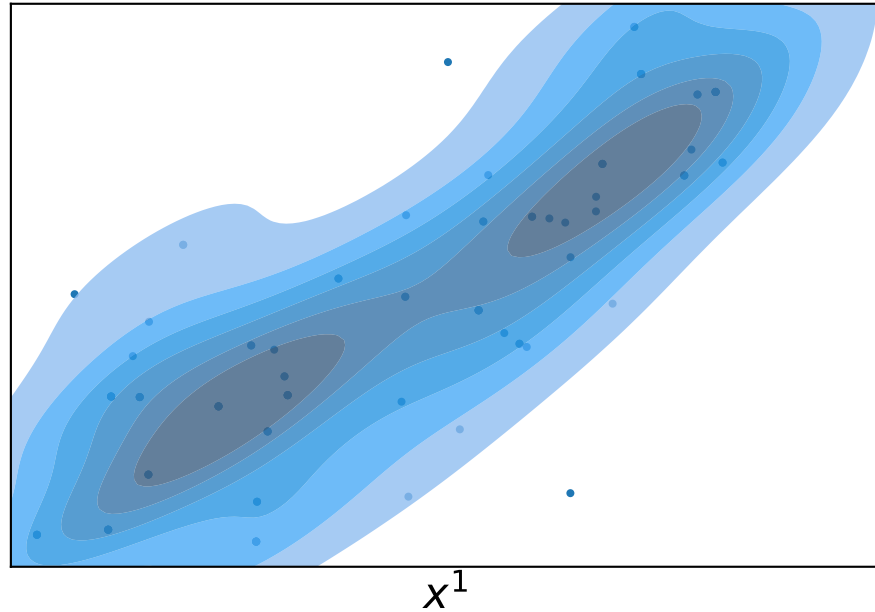

Supplement: supplementary_material [file attachment]

True Samples

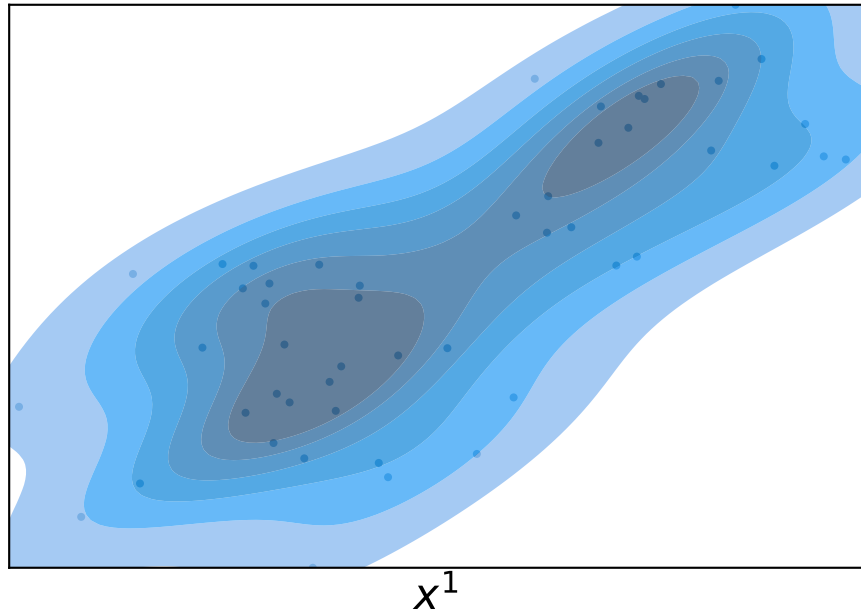

Final Samples

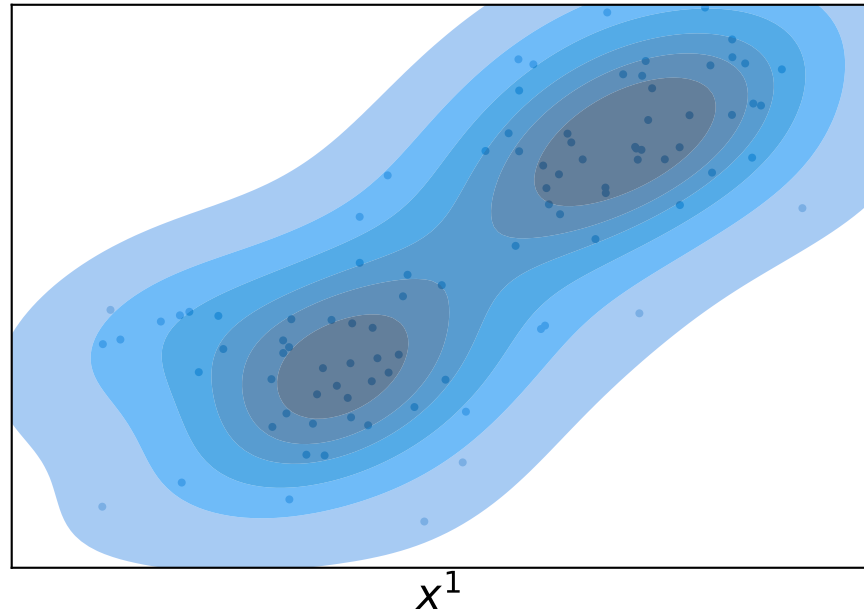

Supplement: supplementary_material [file attachment]

True Samples



Initial Samples



Final Samples

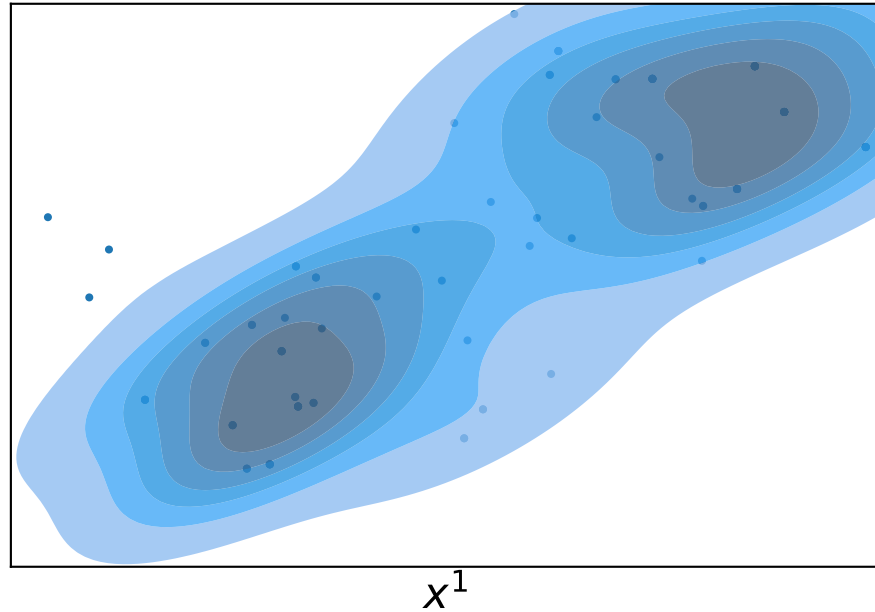

Supplement: supplementary_material [file attachment]

True Samples



Initial Samples



Final Samples

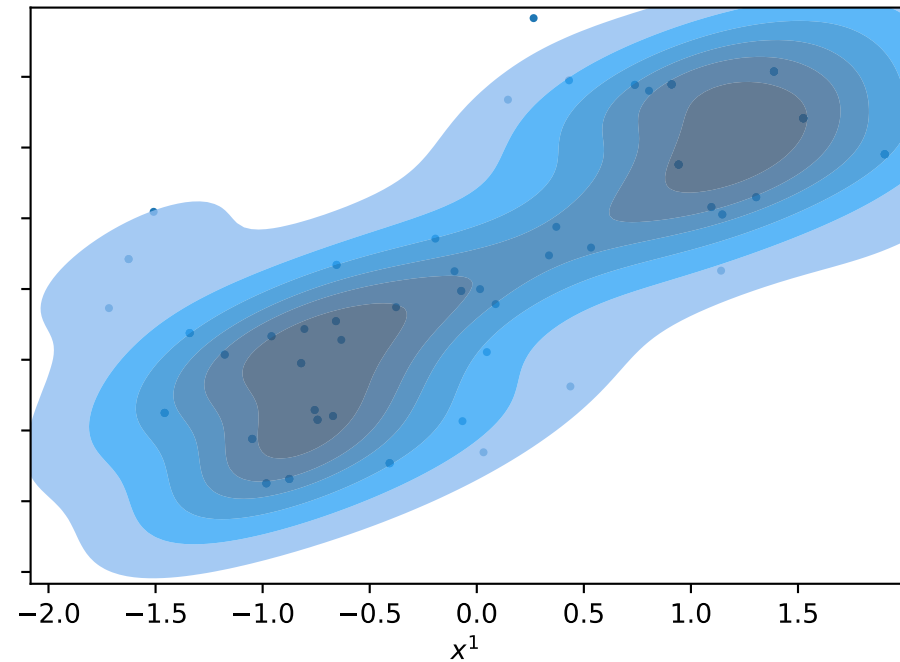

Supplement: supplementary_material [file attachment]
